# Supplementary material for: Effect of Xpcl1 Activation and p27Kip1 Loss on Gene Expression in Murine Lymphoma
Source: PubMed Central journal article supplement (PMC3055866; doi:10.1371/journal.pone.0014758), 2011-03-11
Supplement: pone.0014758.s002.pdf [file pone.0014758.s002.pdf]

**Supporting Table 2: Biological Process of genes with altered expression in tumors.**

| Category                            | Biological Process                       | Observed             | Expected | P-value  |
|-------------------------------------|------------------------------------------|----------------------|----------|----------|
| Xpcl Down                           | Nucleoside, nucleotide metabolism        | 161                  | 113      | 8.40E-05 |
|                                     | Cell cycle                               | 55                   | 33       | 1.19E-02 |
|                                     | Mitosis                                  | 26                   | 12       | 6.51E-02 |
| Xpcl Up                             | Immunity and defense                     | 129                  | 79       | 2.57E-06 |
|                                     | Lipid metabolism                         | 75                   | 45       | 8.07E-04 |
|                                     | Fatty acid metabolism                    | 26                   | 11       | 1.35E-02 |
|                                     | B-cell mediated immunity                 | 18                   | 6        | 1.91E-02 |
|                                     | T-cell mediated immunity                 | 28                   | 13       | 2.81E-02 |
|                                     | Interferon-mediated immunity             | 15                   | 5        | 3.68E-02 |
| p27 null Down                       | Immunity and defense                     | 122                  | 57       | 3.41E-13 |
|                                     | Complement-mediated immunity             | 14                   | 2        | 1.12E-5  |
|                                     | Proteolysis                              | 73                   | 41       | 6.82E-4  |
|                                     | Macrophage-mediated immunity             | 19                   | 5        | 1.36E-3  |
|                                     | B-cell immunity                          | 15                   | 4        | 1.53E-2  |
| p27 null Up                         | Cell cycle                               | 75                   | 46.4     | 1.46E-3  |
|                                     | Protein phosphorylation                  | 59                   | 34.59    | 1.49E-2  |
|                                     | Cell cycle control                       | 38                   | 20.63    | 4.90E-2  |
| Tumors Up                           | Immunity and defense                     | 225                  | 95.45    | 9.26E-31 |
|                                     | Interferon-mediated immunity             | 39                   | 6.08     | 4.97E-17 |
|                                     | T-cell mediated immunity                 | 56                   | 15.61    | 1.82E-13 |
|                                     | Cytokine mediated signaling pathway      | 53                   | 17.18    | 4.40E-10 |
|                                     | Ligand-mediated signaling                | 70                   | 27.09    | 4.85E-10 |
|                                     | Cell communication                       | 142                  | 83.07    | 1.11E-07 |
|                                     | Macrophage-mediated immunity             | 31                   | 9.53     | 3.51E-06 |
|                                     | Cytokine mediated immunity               | 26                   | 7.88     | 3.50E-05 |
|                                     | Cell structure and motility              | 113                  | 71.36    | 5.52E-05 |
|                                     | Apoptosis                                | 65                   | 35.64    | 1.50E-04 |
|                                     | JAK-STAT cascade                         | 21                   | 6.23     | 4.75E-04 |
|                                     | Intracellular signaling cascade          | 98                   | 61.01    | 7.17E-04 |
|                                     | Signal transduction                      | 336                  | 276.97   | 2.22E-03 |
|                                     | MHCI-mediated immunity                   | 14                   | 3.53     | 3.87E-03 |
|                                     | Oncogenesis                              | 50                   | 28.51    | 4.50E-03 |
|                                     | Mesoderm development                     | 66                   | 38.79    | 4.90E-03 |
|                                     | Cell proliferation and differentiation   | 90                   | 61.38    | 8.48E-03 |
|                                     | Developmental processes                  | 189                  | 149.48   | 1.75E-02 |
|                                     | Lipid, fatty acid and steroid metabolism | 78                   | 54.48    | 4.01E-02 |
|                                     | Tumors Down                              | Protein biosynthesis | 59       | 10.6     |
| Nucleoside metabolism               |                                          | 174                  | 80.46    | 3.90E-22 |
| rRNA metabolism                     |                                          | 24                   | 1.82     | 4.47E-17 |
| DNA metabolism                      |                                          | 33                   | 7.7      | 1.02E-09 |
| Pre-mRNA processing                 |                                          | 29                   | 7.14     | 6.58E-08 |
| tRNA metabolism                     |                                          | 13                   | 1.2      | 7.38E-08 |
| mRNA splicing                       |                                          | 23                   | 5.3      | 1.71E-06 |
| DNA repair                          |                                          | 19                   | 3.84     | 4.45E-06 |
| Protein metabolism and modification |                                          | 120                  | 76.01    | 8.44E-06 |
| DNA replication                     |                                          | 16                   | 2.96     | 1.30E-05 |
| Translational regulation            |                                          | 11                   | 1.9      | 7.14E-04 |
| Cell cycle                          |                                          | 42                   | 24.04    | 1.31E-02 |
| Amino acid metabolism               |                                          | 16                   | 6.15     | 1.88E-02 |
| Amino acid activation               |                                          | 7                    | 1.08     | 1.92E-02 |
| Pyrimidine metabolism               |                                          | 7                    | 1.14     | 2.64E-02 |
| DNA recombination                   |                                          | 7                    | 1.14     | 3.60E-02 |
| Nuclear transport                   |                                          | 9                    | 2.05     | 3.96E-02 |

Genes with highest PAM scores were compared to the overall set of genes present on the array using Panther Biological Processes. Ontology enrichment was assessed separately for genes showing increased expression (Xpcl1 up) from those decreased (Xpcl1 down). Likewise gene expression in tumors associated with the p27 null genotype is shown (p27 up and p27 down). Assessment of ontologies for genes increased (Tumors Up) or decreased (Tumor down) in lymphomas vs normal thymus is also shown. For each variable (Xpcl, p27 or tumor status) the top (n=2500) genes associated with the variable were assessed. P-values are from the binomial test with Bonferroni correction for multiple testing. The data in this table are shown graphically in Figure 3.
