# Supplementary material for: Effect of Xpcl1 Activation and p27Kip1 Loss on Gene Expression in Murine Lymphoma
Source: PubMed Central journal article supplement (PMC3055866; doi:10.1371/journal.pone.0014758), 2011-03-11
Supplement: pone.0014758.s004.pdf [file pone.0014758.s004.pdf]

**Supporting Table 4:** Oligonucleotide sequences used for mutagenesis of the 3'UTR of miR-106a~363 target genes

| Symbol | miRNA    | Sequence                                                                 |
|--------|----------|--------------------------------------------------------------------------|
| Grsf1  | 19b      | ATAAGGGATGAAGCAGGAAGCATCTCATT <u>atAt</u> ATCTCTCTGAGACGTG               |
| Nfat5  | 106a/20b | TTGTAATACTCTATTGT <u>GcGcTg</u> AATCATTCCAAAAAAGCCAAGAATA                |
| Nfat5  | 92a      | CTGACTGATTTCAATATATAGG <u>TcCg</u> GTTCTGTATTTCTTTAATTGTTGTGACAC         |
| MycN   | 19b      | GTTTAAAAAAAAAAAAAAAAATCAAAAT <u>aTaCcAg</u> GTGGCAGTGACTGTCCGTGTGGGAAACG |
| MycN   | 106a/20b | ATTTTCATAAACATGAGGTATTT <u>gAcGcGg</u> TCTAAGGTGCAGCACTAAATATATAC        |

Shown are the identities of miRNA and their predicted target genes. The sequences of oligonucleotides used for 3'UTR mutagenesis are shown with the seed sequences (underlined) and mutated bases (in lower case italics).
